# Supplementary material for: Improved Methods for Reprogramming Human Dermal Fibroblasts Using Fluorescence Activated Cell Sorting
Source: PLoS One. 2013 Mar 29;8(3):e59867. doi: 10.1371/journal.pone.0059867 (PMC3612089; doi:10.1371/journal.pone.0059867)
Supplement: Table S10 — Full Nanostring Data Set For Embryoid Bodies Derived From Sendai Reproggrammed Fibroblasts. (XLSX) [file pone.0059867.s013.xlsx]

## Sheet: Sheet1
Gene Name	SRT1	SRTC	PCK1	PCK2	PCK3	Hues42
ABCG2	91.82	34.63	62.78	166.68	63.83	23.05
ACTB	55572.4	63411.3	61415.1	55875.5	62286.8	57991.5
ADIPOQ	120.9	110.1	136.47	701.34	48.48	8.1
ALAS1	134.68	112.77	120.1	147.19	117.97	165.1
ANPEP	433.11	104.78	234.73	365.82	103.42	28.04
APOE	6851.66	4102.22	5699.07	11500.6	5538.08	6895.68
CD34	55.09	37.29	109.18	179.66	50.1	13.71
CD36	39.79	24.86	73.69	38.96	29.09	161.99
CD4	27.55	12.43	24.56	43.29	16.16	6.85
CD44	76.52	92.34	199.25	259.75	106.66	386.28
CDH1	3059.3	1952.55	6651.64	3056.45	4733.3	3754.37
CDH2	4540.74	4940.43	1566.7	3162.52	3229.6	1198.71
CDH5	38.26	25.75	79.15	151.52	25.86	9.35
CDX2	105.6	63.93	87.34	329.02	35.55	12.46
CEACAM1	27.55	12.43	40.94	49.79	18.58	20.56
CRABP2	6294.59	8877.5	5248.71	3610.59	8654.56	1718.31
CTNNB1	9560.5	10064.6	10071.6	11020.1	9305	7543.01
DLL1	404.03	500.79	461.27	73.6	348.25	69.78
EN1	116.31	203.34	43.67	99.57	29.09	8.72
FAS	78.05	97.67	60.05	54.12	62.22	96.57
FGFR2	1548.78	1829.13	1405.66	1671.09	1260.49	1514.58
FOXA2	228.03	143.84	125.55	413.44	87.26	85.35
FUT4	41.32	28.41	81.88	73.6	18.58	27.41
GATA2	50.5	44.4	193.79	229.45	50.9	26.17
GATA3	78.05	66.59	267.48	227.29	135.75	20.56
GATA4	156.1	119.87	103.72	1006.55	76.76	40.5
GATA6	295.37	228.2	150.12	1316.09	135.75	45.48
GCG	29.08	15.98	54.59	30.3	12.93	13.71
HAND1	754.49	473.27	532.24	4246.99	227.05	16.2
HHEX	229.56	147.4	272.94	186.16	193.11	83.49
HNF1A	42.85	21.31	62.78	49.79	24.24	11.21
HNF1B	117.84	71.92	68.24	290.06	33.13	31.15
ICAM1	26.02	27.53	35.48	41.13	41.21	59.19
INHBA	87.23	56.83	141.93	114.73	101	126.47
ISL1	501.98	82.58	526.78	504.36	219.78	28.04
ITGA4	194.36	75.47	54.59	43.29	78.38	34.89
ITGA6	1082	1220.01	1192.76	558.47	1296.85	1416.77
ITGAL	65.81	56.83	98.26	75.76	59.79	36.76
ITGAM	24.49	20.42	43.67	34.63	13.74	13.08
ITGAV	316.8	283.25	270.21	502.19	282.8	261.05
ITGAX	16.83	19.53	60.05	30.3	12.12	22.43
ITGB1	3285.8	3339.49	2928.69	4818.45	3021.14	6688.21
ITGB3	85.7	17.76	40.94	60.61	105.04	8.72
KDR	621.35	610.89	644.15	3692.85	458.95	1854.76
KIT	198.95	165.15	316.61	181.83	190.69	204.35
LEF1	762.15	871.94	483.11	909.14	400.77	14.95
MAP2	1036.09	1563.64	376.66	82.26	832.25	18.69
MAPT	27.55	21.31	46.4	36.8	22.62	18.69
MCAM	156.1	172.26	111.91	56.28	140.59	228.65
MME	58.16	20.42	35.48	147.19	31.51	105.29
MNX1	22.96	25.75	38.21	62.77	17.78	11.21
MYOD1	39.79	39.96	92.8	71.43	22.62	18.69
MYOG	21.43	11.54	30.02	28.14	15.35	8.1
NANOG	44.38	55.05	43.67	90.91	72.72	930.8
NCAM1	561.66	583.37	237.46	783.59	248.06	39.87
NEFL	234.15	147.4	70.97	58.44	149.48	155.76
NES	3024.1	4681.15	1801.43	1394.02	3552	2704.57
NEUROG3	16.83	30.19	49.13	56.28	17.78	9.97
NGFR	426.99	296.57	122.82	103.9	275.53	89.09
NKX2-5	48.97	27.53	103.72	123.38	23.43	21.81
NOG	128.55	191.79	60.05	127.71	188.27	16.2
NOTCH1	521.87	501.68	251.11	272.74	454.91	318.37
OTX2	2347.66	3271.12	1937.9	365.82	2818.33	317.74
PAX3	812.65	808.9	346.64	10.82	468.64	14.33
PAX6	1879.35	2171.87	507.68	45.46	1712.17	21.81
PAX7	70.4	63.93	98.26	86.58	61.41	14.95
PDGFRA	162.22	100.34	144.66	638.56	82.42	42.99
PDX1	45.91	43.51	76.42	71.43	28.28	13.08
PECAM1	108.66	40.84	139.2	257.59	83.22	12.46
POLR2A	1686.52	1765.2	1711.36	1534.72	1717.82	1318.33
POU5F1	1190.66	1944.56	2683.04	1634.29	2630.87	6088.23
POU5F1B	22.96	28.41	32.75	17.32	16.16	13.71
SDC1	358.12	401.34	240.19	257.59	263.41	190.02
SLC2A2	41.32	19.53	49.13	51.95	16.16	8.1
SNAI2	425.46	282.36	158.31	779.26	129.28	21.18
SOX10	241.81	86.13	46.4	28.14	75.14	17.44
SOX2	2964.41	2989.65	1962.47	203.47	3329.79	2019.24
SOX9	852.44	981.16	559.53	214.3	836.29	120.87
SPI1	15.3	10.66	32.75	34.63	14.54	16.82
SRF	867.74	1067.29	1009.89	1054.17	1036.67	862.27
SRY	53.56	40.84	84.61	58.44	32.32	287.22
SST	521.87	39.96	49.13	212.13	24.24	13.08
STAT3	1020.79	956.3	881.61	655.88	1014.86	1344.5
SYP	47.44	37.29	43.67	38.96	25.05	27.41
SeV	26.02	16.87	46.4	25.98	57.37	7.48
T	214.26	201.56	84.61	560.64	118.78	10.59
TDGF1	670.32	1402.04	2011.6	1565.02	2541.18	15823
TH	33.67	35.52	43.67	58.44	24.24	12.46
THY1	1138.63	1302.59	966.22	1034.69	1264.53	5367.39
TNFRSF1A	564.72	491.02	551.35	792.25	518.74	408.08
TWIST1	22.96	19.53	30.02	60.61	17.78	9.97
XIST	97.95	19.53	545.89	1039.02	17.78	9.35
ZFP42	1244.23	1485.5	2276.35	930.79	1881.85	2084.65
r-tSox2	12.24	31.08	35.48	30.3	23.43	12.46
s-tC-Myc	16.83	7.99	38.21	34.63	37.98	2.49
s-tKlf4	29.08	48.84	87.34	93.08	33.13	19.94
s-tOct4	22.96	18.65	32.75	41.13	25.86	3.12
s-tSox2	281.6	293.02	240.19	54.12	295.73	155.13
NEG_A	6	7	3	4	3	8
NEG_B	16	16	13	14	7	15
NEG_C	12	44	13	31	14	23
NEG_D	2	5	5	6	7	1
NEG_E	9	8	14	8	11	4
NEG_F	3	6	4	9	4	4
NEG_G	29	37	25	37	28	13
NEG_H	17	17	17	8	9	12
POS_A	26101	26777	25470	24324	27934	19435
POS_B	6645	6987	6351	6000	7409	5644
POS_C	1551	1529	1490	1406	1750	1266
POS_D	516	611	566	538	648	496
POS_E	118	121	115	115	136	96
POS_F	41	41	34	28	25	22
Transposed
Gene Name	ABCG2	ACTB	ADIPOQ	ALAS1	ANPEP	APOE	CD34	CD36	CD4	CD44	CDH1	CDH2	CDH5	CDX2	CEACAM1	CRABP2	CTNNB1	DLL1	EN1	FAS	FGFR2	FOXA2	FUT4	GATA2	GATA3	GATA4	GATA6	GCG	HAND1	HHEX	HNF1A	HNF1B	ICAM1	INHBA	ISL1	ITGA4	ITGA6	ITGAL	ITGAM	ITGAV	ITGAX	ITGB1	ITGB3	KDR	KIT	LEF1	MAP2	MAPT	MCAM
SRT1	91.82	55572.4	120.9	134.68	433.11	6851.66	55.09	39.79	27.55	76.52	3059.3	4540.74	38.26	105.6	27.55	6294.59	9560.5	404.03	116.31	78.05	1548.78	228.03	41.32	50.5	78.05	156.1	295.37	29.08	754.49	229.56	42.85	117.84	26.02	87.23	501.98	194.36	1082	65.81	24.49	316.8	16.83	3285.8	85.7	621.35	198.95	762.15	1036.09	27.55	156.1
SRTC	34.63	63411.3	110.1	112.77	104.78	4102.22	37.29	24.86	12.43	92.34	1952.55	4940.43	25.75	63.93	12.43	8877.5	10064.6	500.79	203.34	97.67	1829.13	143.84	28.41	44.4	66.59	119.87	228.2	15.98	473.27	147.4	21.31	71.92	27.53	56.83	82.58	75.47	1220.01	56.83	20.42	283.25	19.53	3339.49	17.76	610.89	165.15	871.94	1563.64	21.31	172.26
PCK1	62.78	61415.1	136.47	120.1	234.73	5699.07	109.18	73.69	24.56	199.25	6651.64	1566.7	79.15	87.34	40.94	5248.71	10071.6	461.27	43.67	60.05	1405.66	125.55	81.88	193.79	267.48	103.72	150.12	54.59	532.24	272.94	62.78	68.24	35.48	141.93	526.78	54.59	1192.76	98.26	43.67	270.21	60.05	2928.69	40.94	644.15	316.61	483.11	376.66	46.4	111.91
PCK2	166.68	55875.5	701.34	147.19	365.82	11500.6	179.66	38.96	43.29	259.75	3056.45	3162.52	151.52	329.02	49.79	3610.59	11020.1	73.6	99.57	54.12	1671.09	413.44	73.6	229.45	227.29	1006.55	1316.09	30.3	4246.99	186.16	49.79	290.06	41.13	114.73	504.36	43.29	558.47	75.76	34.63	502.19	30.3	4818.45	60.61	3692.85	181.83	909.14	82.26	36.8	56.28
PCK3	63.83	62286.8	48.48	117.97	103.42	5538.08	50.1	29.09	16.16	106.66	4733.3	3229.6	25.86	35.55	18.58	8654.56	9305	348.25	29.09	62.22	1260.49	87.26	18.58	50.9	135.75	76.76	135.75	12.93	227.05	193.11	24.24	33.13	41.21	101	219.78	78.38	1296.85	59.79	13.74	282.8	12.12	3021.14	105.04	458.95	190.69	400.77	832.25	22.62	140.59
Hues42	23.05	57991.5	8.1	165.1	28.04	6895.68	13.71	161.99	6.85	386.28	3754.37	1198.71	9.35	12.46	20.56	1718.31	7543.01	69.78	8.72	96.57	1514.58	85.35	27.41	26.17	20.56	40.5	45.48	13.71	16.2	83.49	11.21	31.15	59.19	126.47	28.04	34.89	1416.77	36.76	13.08	261.05	22.43	6688.21	8.72	1854.76	204.35	14.95	18.69	18.69	228.65
Min/Max Normalization
Original Min	23.05	55572.4	8.1	112.77	28.04	4102.22	13.71	24.86	6.85	76.52	1952.55	1198.71	9.35	12.46	12.43	1718.31	7543.01	69.78	8.72	54.12	1260.49	85.35	18.58	26.17	20.56	40.5	45.48	12.93	16.2	83.49	11.21	31.15	26.02	56.83	28.04	34.89	558.47	36.76	13.08	261.05	12.12	2928.69	8.72	458.95	165.15	14.95	18.69	18.69	56.28
Original Max	166.68	63411.3	701.34	165.1	433.11	11500.6	179.66	161.99	43.29	386.28	6651.64	4940.43	151.52	329.02	49.79	8877.5	11020.1	500.79	203.34	97.67	1829.13	413.44	81.88	229.45	267.48	1006.55	1316.09	54.59	4246.99	272.94	62.78	290.06	59.19	141.93	526.78	194.36	1416.77	98.26	43.67	502.19	60.05	6688.21	105.04	3692.85	316.61	909.14	1563.64	46.4	228.65
New Min	0
New Max	1
Gene Name	ABCG2	ACTB	ADIPOQ	ALAS1	ANPEP	APOE	CD34	CD36	CD4	CD44	CDH1	CDH2	CDH5	CDX2	CEACAM1	CRABP2	CTNNB1	DLL1	EN1	FAS	FGFR2	FOXA2	FUT4	GATA2	GATA3	GATA4	GATA6	GCG	HAND1	HHEX	HNF1A	HNF1B	ICAM1	INHBA	ISL1	ITGA4	ITGA6	ITGAL	ITGAM	ITGAV	ITGAX	ITGB1	ITGB3	KDR	KIT	LEF1	MAP2	MAPT	MCAM
SRT1	0.4788	0	0.162714	0.418689	1	0.371625	0.249352	0.108875	0.568057	0	0.235524	0.89318	0.203348	0.294225	0.404711	0.639218	0.580224	0.775504	0.552821	0.549483	0.506982	0.434881	0.359242	0.119687	0.232828	0.119663	0.196669	0.387662	0.174504	0.771021	0.613535	0.334827	0	0.357227	0.950275	1	0.609962	0.472358	0.372998	0.231193	0.0982683	0.0949882	0.799211	0.050218	0.223161	0.835617	0.658533	0.31974	0.579103
SRTC	0.0806238	1	0.147135	0	0.189449	0	0.142091	0	0.153128	0.0510718	0	1	0.115355	0.162592	0	1	0.725216	1	1	1	1	0.178274	0.155292	0.0896793	0.186417	0.0821593	0.143805	0.0732117	0.108034	0.337345	0.19585	0.157468	0.0455231	0	0.109356	0.254468	0.770756	0.326341	0.239948	0.0920627	0.1546	0.109269	0.0938538	0.0469835	0	0.958398	1	0.0945507	0.672855
PCK1	0.276614	0.745342	0.185174	0.140073	0.510257	0.215836	0.575294	0.356085	0.486004	0.39621	1	0.0983478	0.490962	0.236543	0.763116	0.493128	0.72722	0.908308	0.179581	0.136165	0.255293	0.122527	1	0.824577	1	0.0654417	0.0823541	1	0.121972	1	1	0.143254	0.285197	1	1	0.123534	0.739007	1	1	0.0379862	1	0	0.33451	0.0572683	1	0.523558	0.231703	1	0.322736
PCK2	1	0.038661	1	0.657749	0.833881	1	1	0.102822	1	0.591522	0.234918	0.524842	1	1	1	0.264315	1	0.0088629	0.466807	0	0.722074	1	0.869194	1	0.837235	1	1	0.416947	1	0.541937	0.748109	1	0.455532	0.680376	0.955047	0.0526745	0	0.634146	0.704479	1	0.379303	0.50266	0.538725	1	0.110128	1	0.041147	0.653555	0
PCK3	0.283924	0.856545	0.0582482	0.0993694	0.186091	0.194076	0.219283	0.0308466	0.255488	0.0973011	0.591764	0.542769	0.116129	0.0729404	0.164615	0.96886	0.506743	0.646087	0.104666	0.185993	0	0.00582157	0	0.121655	0.466507	0.0375343	0.0710446	0	0.049837	0.578622	0.252666	0.00764745	0.457944	0.519036	0.384449	0.272716	0.860282	0.374472	0.0215757	0.0901966	0	0.0245909	1	0	0.168625	0.431474	0.526593	0.141826	0.489122
Hues42	0	0.3086	0	1	0	0.377575	0	1	0	1	0.38344	0	0	0	0.217612	0	0	0	0	0.974742	0.446838	0	0.139494	0	0	0	0	0.018723	0	0	0	0	1	0.818331	0	0	1	0	0	0	0.215105	1	0	0.431618	0.258814	0	0	0	1
[truncated: 63 more columns]
